# Supplementary material
Source: HighWire-hosted journal article supplement (http://jpet.aspetjournals.org/highwire/filestream/150487/field_highwire_adjunct_files/0/686SupplFigure.pdf)
Supplement: 686SupplFigure.pdf [file 686SupplFigure.pdf]

Supplemental information

Journal of Pharmacology and Experimental Therapeutics

JPET-AR-2021-000686

**ASP7266, a novel antibody against human thymic stromal lymphopoietin receptor for the treatment of allergic diseases**

Mako Numazaki, Masaki Abe, Kaori Hanaoka, Emiko Imamura, Masashi Maeda, Akihiko Kimura, Jun Miyanohara, Tetsu Saito, Kazunori Arai, Hiroshi Suzuki, Yuji Saita

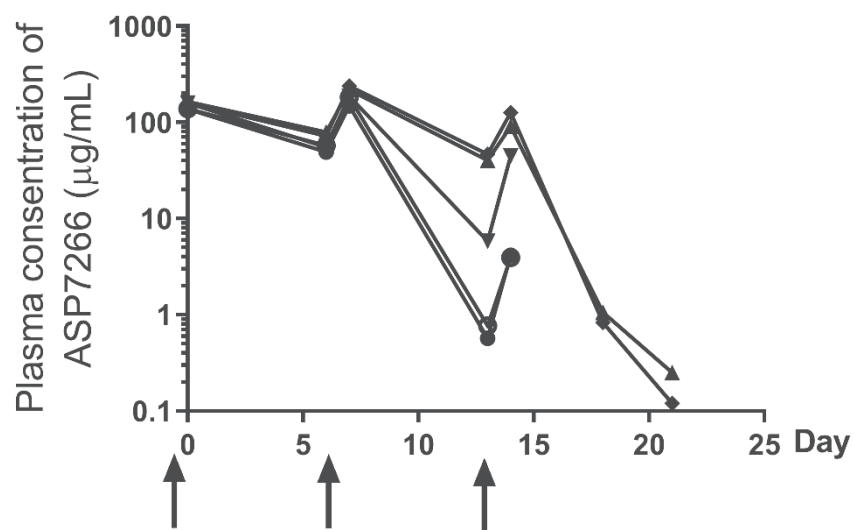

**Supplement Figure 1**

Pharmacokinetics of ASP7266 in a monkey model. The arrows indicate the time points at which ASP7266 was administered. Data are shown for each subject.
